# Supplementary material for: Adsorption of diclofenac on a magnetic adsorbent based on maghemite: experimental and theoretical studies
Source: Royal Society of Chemistry journal article supplement (doi:10.1039/c7nj03214e), 2017-11-23
Supplement: c7nj03214e1.pdf [file c7nj03214e1.pdf]

## Electronic Supplementary Information

### Adsorption of diclofenac on a magnetic adsorbent based on maghemite: experimental and theoretical studies

V. L. Oliveira,<sup>a</sup> M. C. Pereira,<sup>b</sup> S. F. Aquino,<sup>a</sup> L. C. A. Oliveira,<sup>c</sup> S. Correa,<sup>d</sup> T. C. Ramalho,<sup>d</sup>  
L. V. A. Gurgel,<sup>a</sup> and A. C. Silva<sup>a\*</sup>

<sup>a</sup>*Departamento de Química, Universidade Federal de Ouro Preto, Ouro Preto 35400-000, Minas Gerais, Brazil*

<sup>b</sup>*Instituto de Ciência, Engenharia e Tecnologia, Universidade Federal dos Vales Jequitinhonha e Mucuri, Teófilo Otoni 39803-371, Minas Gerais, Brazil*

<sup>c</sup>*Departamento de Química, Universidade Federal de Minas Gerais, Belo Horizonte 31270-090, Minas Gerais, Brasil*

<sup>d</sup>*Departamento de Química, Universidade Federal de Lavras, Lavras 37200-000, Minas Gerais, Brazil*

**\*Corresponding author.** [adilsonufla@gmail.com](mailto:adilsonufla@gmail.com); [adilsonqui@iceb.ufop.br](mailto:adilsonqui@iceb.ufop.br)

**Table S1.** Isotherm parameters estimated for diclofenac adsorption on maghemite at pH 7.0 and different temperatures.

| Temperature (K)                                                  | 283                   | 288                   | 298                   | 308                   | 318                   |
|------------------------------------------------------------------|-----------------------|-----------------------|-----------------------|-----------------------|-----------------------|
| $Q_{\max, \text{exp}} \text{ (mg g}^{-1}\text{)}$                | 199.68                | 234.36                | 257.10                | 249.85                | 244.40                |
| $\mu \text{ (mol L}^{-1}\text{)}$                                | $2.21 \times 10^{-4}$ | $1.66 \times 10^{-4}$ | $1.34 \times 10^{-4}$ | $1.08 \times 10^{-4}$ | $4.42 \times 10^{-5}$ |
| $\gamma_e$                                                       | 0.983                 | 0.985                 | 0.987                 | 0.988                 | 0.992                 |
| <b>Langmuir</b>                                                  |                       |                       |                       |                       |                       |
| $Q_{\max, \text{est}} \text{ (mg g}^{-1}\text{)}$                | 228.06                | 244.16                | 260.74                | 254.08                | 251.52                |
| $b \text{ (L mg}^{-1}\text{)}$                                   | 0.050                 | 0.183                 | 0.700                 | 1.100                 | 1.312                 |
| $b \text{ (L mol}^{-1}\text{)}$                                  | 15873.6               | 58128.4               | 222691.0              | 349943.0              | 417460.8              |
| $K_a \text{ (b } \gamma_e^{-1}\text{)}$                          | 16143.4               | 58986.2               | 225638.8              | 354108.9              | 420645.3              |
| $R^2$                                                            | 0.9891                | 0.9744                | 0.8993                | 0.8608                | 0.9922                |
| $\chi^2_{\text{red}}$                                            | 31.6411               | 36.2608               | 1083.7783             | 1867.3865             | 27.7859               |
| <b>Sips</b>                                                      |                       |                       |                       |                       |                       |
| $Q_{\max, \text{est}} \text{ (mg g}^{-1}\text{)}$                | 224.80                | 260.61                | 257.61                | 249.85                | 250.71                |
| $b \text{ (L mg}^{-1}\text{)}$                                   | 0.052                 | 0.174                 | 1.465                 | 18.920                | 1.313                 |
| $b \text{ (L mol}^{-1}\text{)}$                                  | 16422.3               | 55312.0               | 465945.9              | 6019019.6             | 417644.2              |
| $n$                                                              | 0.969                 | 1.308                 | 1.069                 | 0.027                 | 0.9706                |
| $R^2$                                                            | 0.9855                | 0.9780                | 0.9122                | 0.7911                | 0.9905                |
| $\chi_{\text{red}}^2$                                            | 41.8043               | 31.2272               | 944.53                | 2802.3475             | 33.8665               |
| <b>Freundlich</b>                                                |                       |                       |                       |                       |                       |
| $K_F \text{ [(mg g}^{-1}\text{/L mg}^{-1}\text{)}^{1/n}\text{]}$ | 39.43                 | 105.76                | 151.83                | 235.07                | 151.91                |
| $n$                                                              | 2.941                 | 5.614                 | 7.410                 | 63.012                | 7.950                 |
| $R^2$                                                            | 0.9317                | 0.9315                | 0.8791                | 0.8608                | 0.7379                |
| $\chi^2_{\text{red}}$                                            | 197.5557              | 97.1057               | 1301.3921             | 1866.6667             | 938.4655              |
| <b>Temkin</b>                                                    |                       |                       |                       |                       |                       |
| $b_T \text{ (kJ mol}^{-1}\text{)}$                               | 48.45                 | 68.09                 | 84.29                 | 91.50                 | 97.74                 |
| $A_T \text{ (L g}^{-1}\text{)}$                                  | 0.501                 | 8.930                 | 135.79                | 160.96                | 221.60                |
| $R^2$                                                            | 0.9774                | 0.9586                | 0.8978                | 0.8565                | 0.8178                |
| $\chi^2_{\text{red}}$                                            | 65.4371               | 58.729                | 1099.8890             | 1924.1692             | 652.0215              |

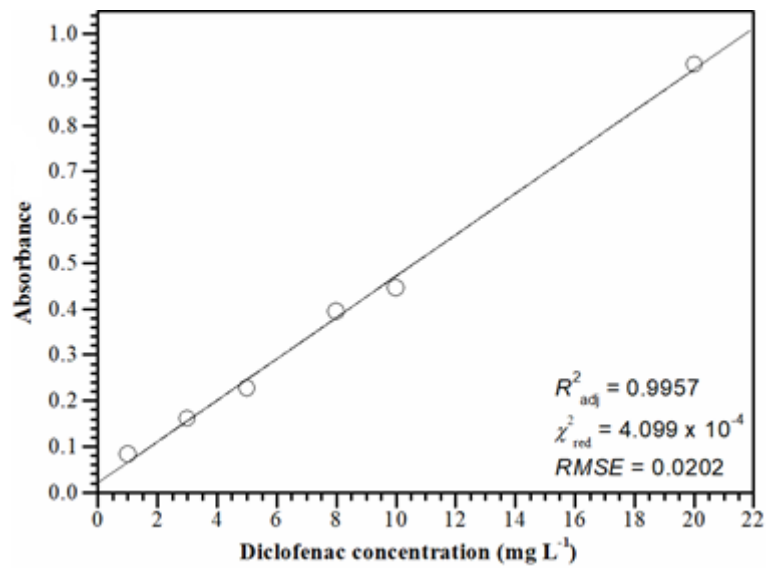

**Fig. S1.** Standard calibration curve for diclofenac.

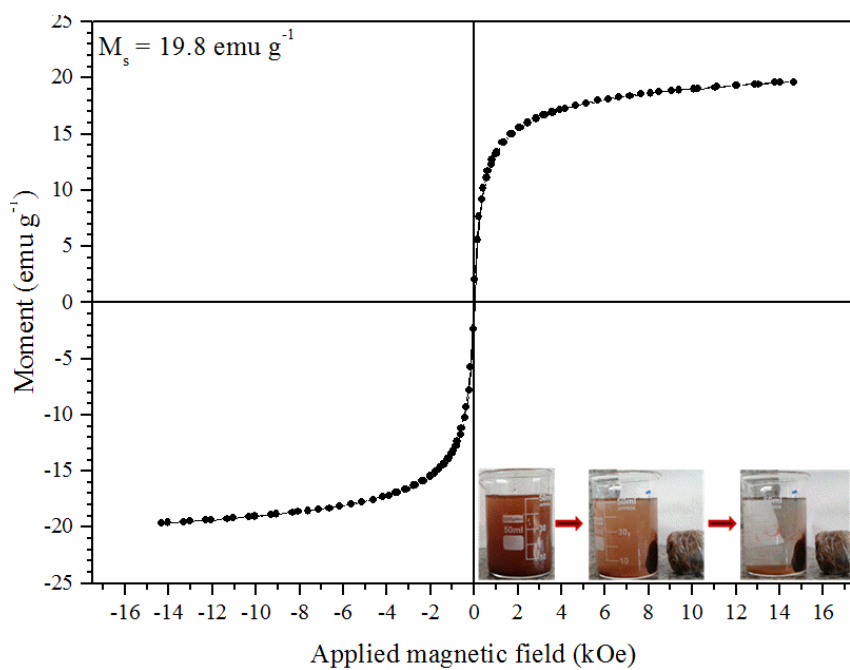

**Fig. S2.** Magnetization curve for the maghemite.

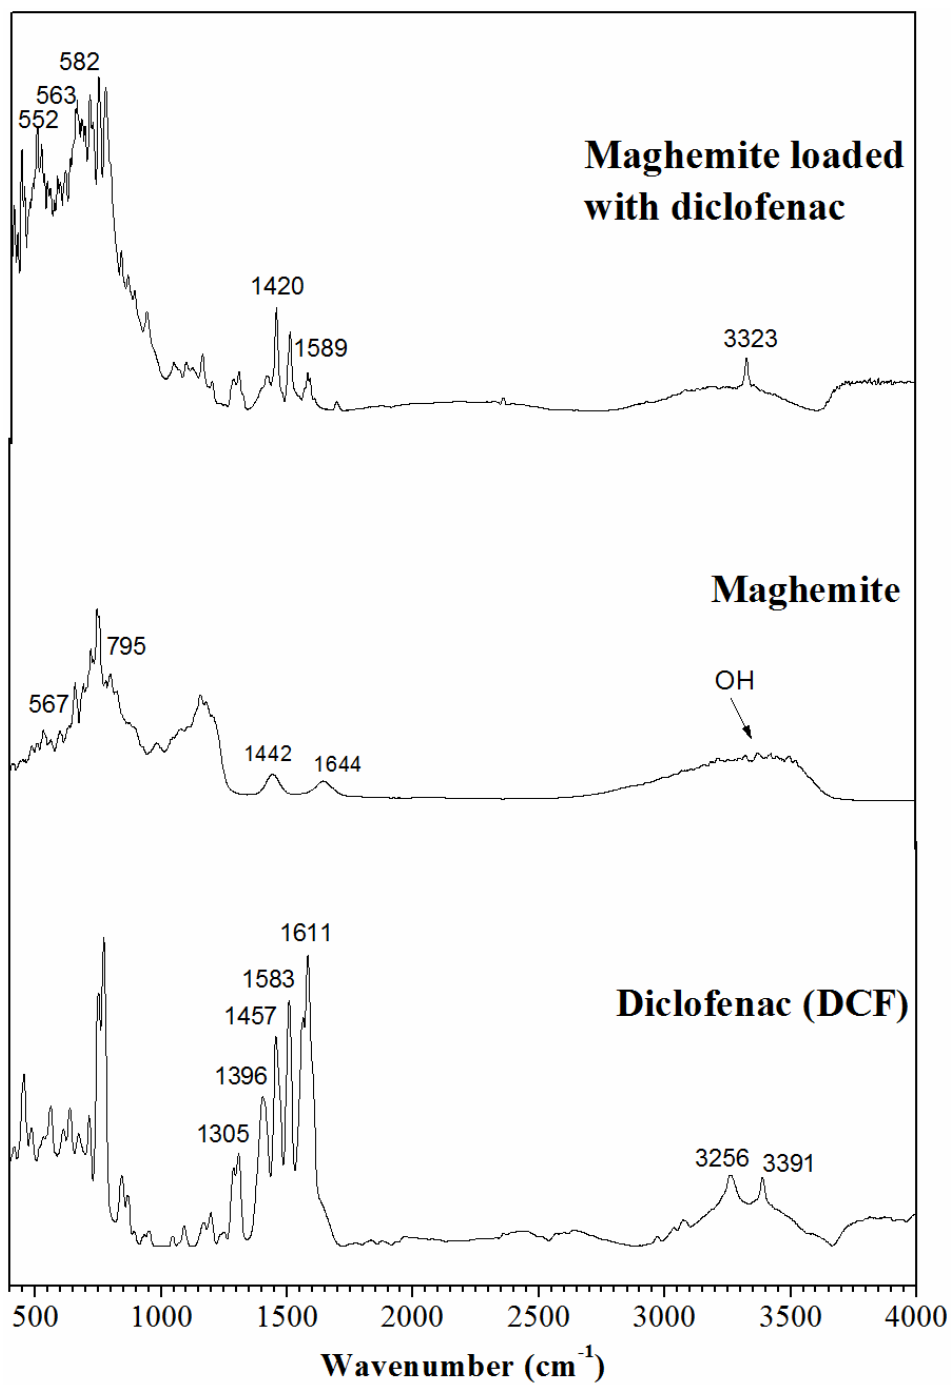

**Fig. S3.** Infrared spectra of DCF, maghemite, and maghemite loaded with DCF obtained by diffuse reflectance infrared Fourier spectroscopy (DRIFTS).

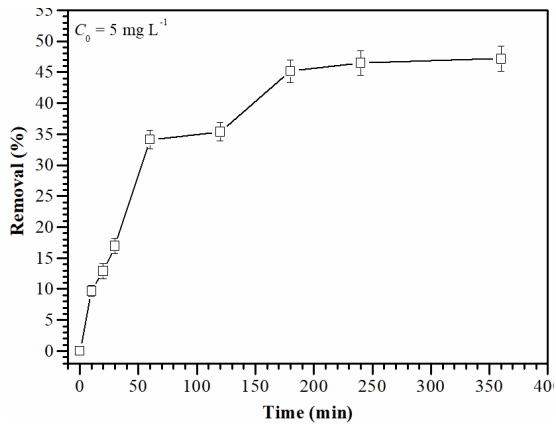

(a)

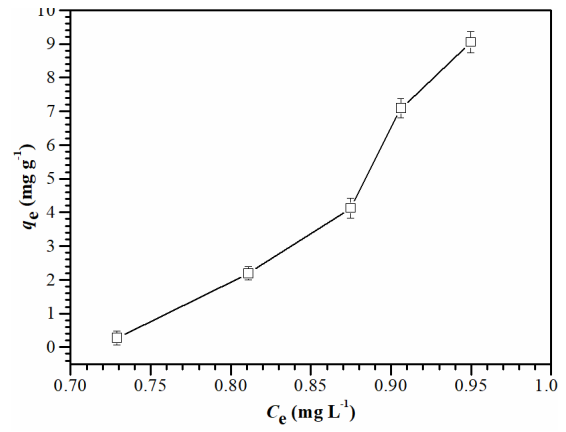

(b)

**Fig. S4.** (a) Adsorption of 5 mg L<sup>-1</sup> diclofenac by maghemite as a function of time at 298 K and (b) Adsorption isotherm at a lower concentration of diclofenac at 298 K.

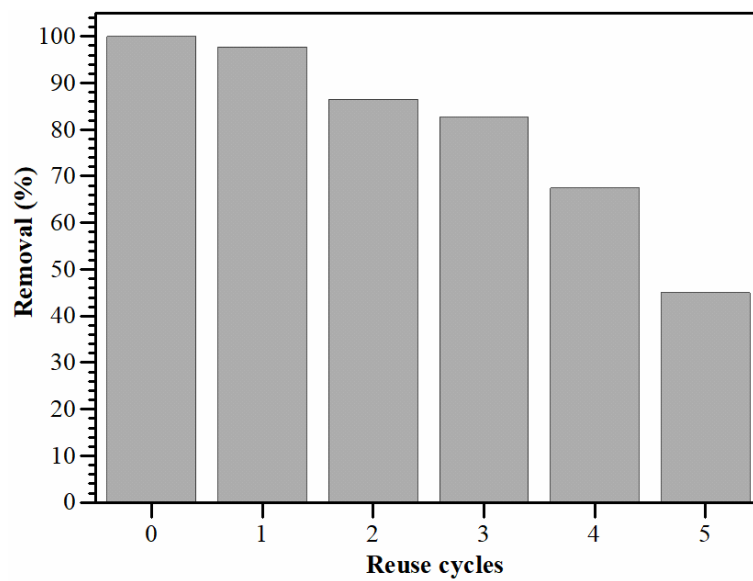

**Fig. S5.** Recyclability of maghemite for the DFC (5 mg L<sup>-1</sup>) adsorption.
